# Supplementary material
Source: publisher figshare collection journal article supplement (https://rs.figshare.com/ndownloader/files/13393787)
Supplement: Supplementary file 1 [file 13393787]

**Supplementary Information**

**Social cues can push amphibious fish to their thermal limits**

Suzanne Currie1,2 and Glenn J. Tattersall3

1 Department of Biology, Acadia University, Wolfville, NS, Canada

2 Department of Biology, Mount Allison University, Sackville, New Brunswick, Canada.

3 Department of Biological Sciences, Brock University, St. Catharines, ON, Canada

**Supplementary Methods**

**Thermal Imaging of Surface Water**

In order to minimise instrument interference with fish behaviour and ensure sufficient thermal mixing, we measured water surface temperatures with a thermal imaging camera (FLIR T1030K). One experimenter continually monitored the camera and recorded the average temperature within a prescribed region of the water surface from the region of interest for each behavioural occurrence. We set object parameters to the appropriate conditions (reflected environment temperature was ~30°C, emissivity for water was 0.95, distance was 1.5 m) using on-board settings available in the camera. The camera was calibrated by the manufacturer (<6 months prior to use) and verified to be within 0.5°C of a standard NIST bulb thermometer.

**Potential order effects**

Given the paired nature of the experiments, we examined the potential for immediate, prior experience to influence results by including procedure order for all the relevant behaviours in a linear mixed effect model. Order was nearly fully balanced, such that ~50% of replicates were conducted with the opaque object first, and 50% with the mirror object first.

**Detailed behaviour threshold summaries**

To visualise the pattern of behavioural thresholds, we combined results from the emersion experiments and the loss of equilibrium experiments into a linear mixed effects model, with threshold temperature as the response variable and behaviour as the predictor variable. We classified 10 potential behaviour categories: mirror display, mirror charges, surface excursions, surface breaks, emersion, and loss of equilibrium, where the latter four occurred under both mirror and opaque conditions. The final model allowed for model predictions for each category to be estimated and visualised.

**Statistical Analysis**

We analysed all behaviours using linear mixed effects models with the lmerTest package (Kuznetsova et al., 2017) in R v. 3.5.1 (R Core Team, 2018). This approach was selected rather than paired t-tests since it can accommodate missing data, although yields identical conclusions to paired t-test for fully balanced experimental designs. An additional advantage of the linear mixed effects approach is the ability to include multiple response variables in the final model. For the main paper, we report on the primary treatment effects, since these were the only significant results and the primary focus. In the supplementary material, we include experimental order and treatment and report on the results for the order effect. Degrees of freedom estimation was achieved using the Satterthwaite approximation as outlined in the lmerTest package (Kuznetsova et al., 2017). This approach is less anti-conservative than likelihood ratio tests for small or unbalanced datasets and, thus more closely estimates the true p value (Kuznetsova et al., 2017). Residuals were verified for normality and homoskedasticity, and data log transformed for responses where necessary (only the rates of emersion). Model effects and standard errors were obtained using the Effects package in R (Fox, 2013). The alpha for statistical significance was set to 0.05. Figures were produced using the ggplot2 package in R (Wickham, 2016).

**Supplementary Results**

*Order effects*

For all behaviours assessed, order had no significant effect (Fig. S2): emersion temperature threshold: F1,27 = 0.01, P = 0.92; emersion experiment surface behaviours: F1,13 = 0.14, P = 0.72; loss of equilibrium temperature: F1, 8 = 3.14, P = 0.11; and loss of equilibrium experiment surface behaviours: F1, 8 = 0.29, P = 0.69.

**References**

Fox, J. (2003). Effect Displays in R for Generalised Linear Models. Journal

of Statistical Software, 8(15), 1-27. <http://www.jstatsoft.org/v08/i15/>.

Kuznetsova A, Brockhoff PB, Christensen RHB (2017). “lmerTest Package: Tests

in Linear Mixed Effects Models.” Journal of Statistical Software, 82,

1-26. doi: 10.18637/jss.v082.i13 (URL: http://doi.org/10.18637/jss.v082.i13).

R Core Team (2018). R: A language and environment for statistical computing.

R Foundation for Statistical Computing, Vienna, Austria. URL

<https://www.R-project.org/>.

Wickham, H. ggplot2: Elegant Graphics for Data Analysis. Springer-Verlag New

York, 2016.

**Supplementary Figure 1.** Schematic of the tank used to assess behaviours related to rapid warming. We separated the test portion of chamber from the stir bar and submersible water heater by a mesh screen to allow for water circulation and thermal mixing. The fish interacted with a mirror (or opaque, size-matched object) under water along one edge of the test chamber. For experiments involving loss of equilibrium or to assess the effects of blocking access to the aerial environment, we placed an additional mesh screen on the water surface.

**Supplementary Figure 2.** Threshold temperatures from the emersion and loss of equilibrium experiments (combined), categorised for each respective behaviour in Mangrove rivulus (N=26; see methods for precise breakdown within each experiment) exposed to a mirror or an opaque object. The large circles depict the model (± se) predictions from a linear mixed effects model with fish identity incorporated as a random intercept. Individual responses in smaller circles represent the first observation for each behaviour within each experiment. Abbreviations: LD, lateral display; MC, mirror charge; SE, surface excursion; BS, break surface; ET, emersion; LOE, loss of equilibrium.
